# Supplementary material for: In situ analysis of FGFR2 mRNA and comparison with FGFR2 gene copy number by dual-color in situ hybridization in a large cohort of gastric cancer patients
Source: Gastric Cancer. 2017 Aug 29;21(3):401–12. doi: 10.1007/s10120-017-0758-x (PMC5906494; doi:10.1007/s10120-017-0758-x)
Supplement: Supplementary file 4 — Supplementary material 4 (XLSX 12 kb) [file 10120_2017_758_MOESM4_ESM.xlsx]

## Sheet: Sup Table 5
Supplementary Table 5
Title: In situ analysis of FGFR2 mRNA and comparison with FGFR2 gene copy number by dual-color in situ hybridization in a large cohort of gastric cancer patients
Journal: Gastric Cancer
Authors: Yasutoshi Kuboki, Christoph A. Schatz, Karl Koechert, Sabine Schubert, Janine Feng, Sabine Wittemer-Rump, Karl Ziegelbauer, Thomas Krahn, Akiko Kawano Nagatsuma, Atsushi Ochiai
Corresponding author: Christoph A. Schatz, email: christoph.schatz@bayer.com
FGFR2 RNA positive [Score >3]		FGFR2 RNA negative [Score 0-3]		p-value	FGFR2 DISH positive [FGFR2:CEN10>5]		FGFR2 DISH negative [FGFR2:CEN10≤5]		p-value
Mean	STDW	Mean	STDW		Mean	STDW	Mean	STDW
63.2	10.6945	63.4896	10.736	0.886	62.4118	12.8747	63.8608	10.614	0.515

## Sheet: Sup Table 6
Supplementary Table 6
Journal: Gastric Cancer
Title: In situ analysis of FGFR2 mRNA and comparison with FGFR2 gene copy number by dual-color in situ hybridization in a large cohort of gastric cancer patients
Journal: Gastric Cancer
Authors: Yasutoshi Kuboki, Christoph A. Schatz, Karl Koechert, Sabine Schubert, Janine Feng, Sabine Wittemer-Rump, Karl Ziegelbauer, Thomas Krahn, Akiko Kawano Nagatsuma, Atsushi Ochiai
Corresponding author: Christoph A. Schatz, email: christoph.schatz@bayer.com
		FGFR2 RNA positive [Score >3]	FGFR2 RNA negative [Score 0-3]	ChisQuare / Fisher test p-value	FGFR2 DISH positive [FGFR2:CEN10>5]	FGFR2 DISH negative [FGFR2:CEN10≤5]	ChisQuare / Fisher test p-value
		number	number		number	number
Gender	male	5	213	0.129	13	383	0.413
	female	25	463		3	170
Histology	pap	1	19	0.489	0	16	0.785
	tub1	4	106		2	93
	tub2	9	228		5	184
	por1	1	58		1	50
	por2	10	181		6	147
	sig	3	72		1	52
	muc	2	12		1	11
differen- tiation	differentiated	15	356	0.921	7	298	0.584
	undifferentiated	15	320		9	255
macroscopic classification	1	8	328	0.115	4	264	0.075
	2	0	18		0	15
	3	6	96		1	83
	4	11	168		7	138
	5	5	56		4	43
	6	0	10		0	10
T-stage	1	7	310	0.005	3	253	0.003
	2	3	89		1	74
	3	8	173		3	132
	4	12	104		9	94
lymphnode metastasis	x	0	1	0.009	0	1	0.004
	0	9	389		3	306
	1	21	286		13	247
adjuvant chemo	0	25	589	0.627	12	481	0.112
	1	5	80		4	63
stage	I	7	337	0.008	3	273	0.004
	II	7	157		2	125
	III	10	125		7	107
	IV	6	57		4	48
